# Supplementary material
Source: PubMed Central journal article supplement (PMC10164413)
Supplement: NIHMS1885299-supplement-1.pdf [file NIHMS1885299-supplement-1.pdf]

## SUPPLEMENTAL INFORMATION

### **Hematopoietic Stem Cells Preferentially Traffic Misfolded Proteins to Aggresomes and Depend on Aggrephagy to Maintain Protein Homeostasis**

Bernadette A. Chua<sup>1</sup>, Connor J. Lennan<sup>1</sup>, Mary Jean Sunshine<sup>1</sup>, Daniela Dreifke<sup>1</sup>, Ashu Chawla<sup>2</sup>, Eric J. Bennett<sup>3</sup>, Robert A.J. Signer<sup>1,4\*</sup>

<sup>1</sup>*Division of Regenerative Medicine, Department of Medicine, Sanford Stem Cell Institute, Moores Cancer Center, University of California San Diego, La Jolla, CA, 92093 USA.*

<sup>2</sup>*La Jolla Institute for Immunology, La Jolla, CA, 92037 USA.*

<sup>3</sup>*Section of Cell and Developmental Biology, University of California San Diego, La Jolla, CA 92093, USA.*

<sup>4</sup>Lead contact

\*Correspondence:

Robert A.J. Signer  
UC San Diego Moores Cancer Center  
3855 Health Sciences Drive  
La Jolla, CA 92093-0652  
USA  
Tel: 858-534-0732  
Email: [rsigner@ucsd.edu](mailto:rsigner@ucsd.edu)  
Twitter: [@SignerLab](https://twitter.com/SignerLab)

## Figure S1 (Related to Figure 1)

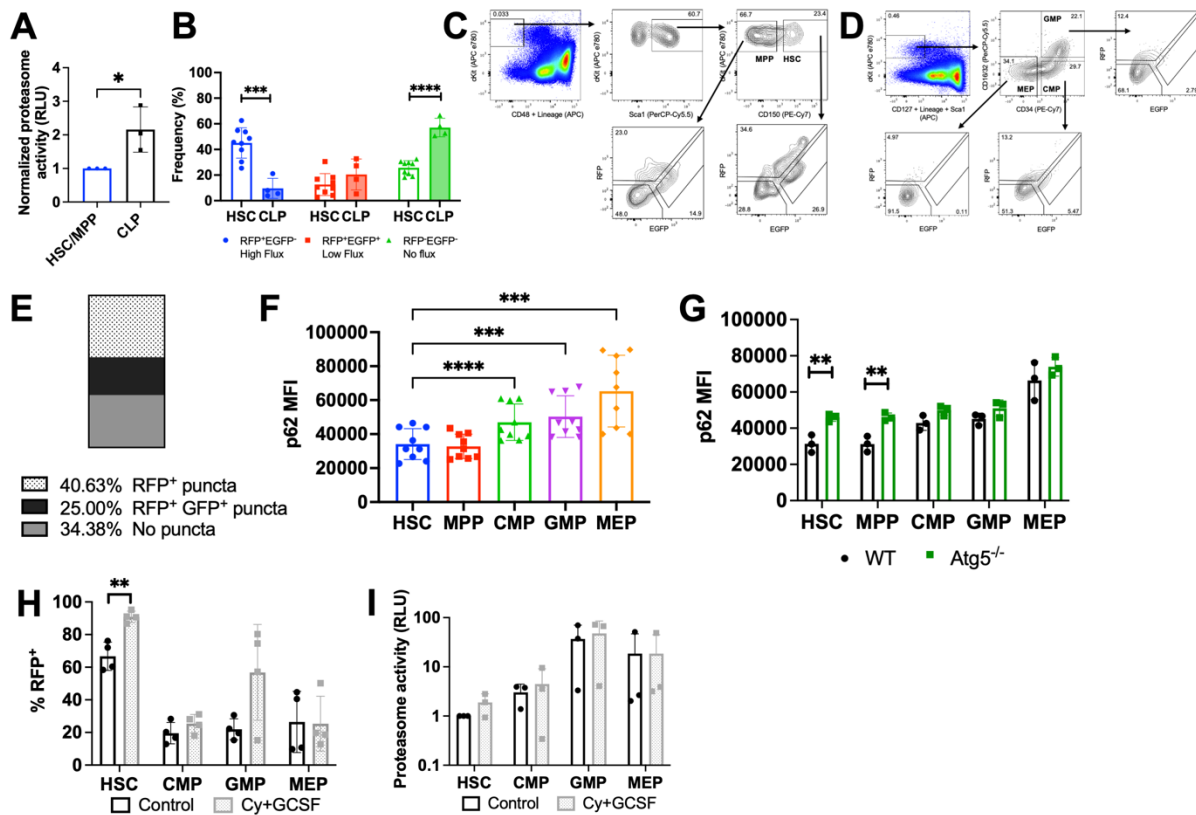

Figure S1. Identification of autophagic HSCs and progenitors using flow cytometry. Related to Figure 1.

- A** Proteasome activity in CD48<sup>+</sup> LSK HSC/MPPs as compared to CLPs. Data show technical replicates and mean ± SD; n=3. Data were assessed using a student's t-test.
- B** Frequency of HSCs and CLPs exhibiting high, low, and no autophagic flux. Data show technical replicates and mean ± SD; n=4-9. Data were assessed using a student's t-test.
- C-D.** Gating strategy to identify HSCs and MPPs (C) and myeloid progenitors (D) in CAG-RFP-EGFP-LC3 mice.
- E** Frequency of HSCs exhibiting RFP<sup>+</sup>, RFP<sup>+</sup>EGFP<sup>+</sup>, and no puncta as analyzed by confocal microscopy. Individual HSCs were assessed; n=30.
- F** p62 (mean fluorescence intensity; MFI) in HSCs and progenitors at steady state in vivo. Data show individual mice and mean ± SD; n=9. Data were assessed by one-way ANOVA with Dunnett's test relative to HSCs.
- G** p62 (MFI) in WT and *Atg5*<sup>-/-</sup> cells at steady state in vivo. Data show individual mice and mean ± SD; n=3. Data were assessed using a paired student's t-test.

- H Frequency of cells exhibiting autophagic activity (RFP<sup>+</sup>) in CAG-RFP-EGFP-LC3 mice treated with vehicle (PBS; control) or cyclophosphamide and GCSF. Data show individual mice and mean  $\pm$  SD; n=4. Data were assessed using a paired student's t-test.
- I Proteasome activity in hematopoietic stem and progenitor cells from mice treated with vehicle (PBS; control) or cyclophosphamide and GCSF. Data show technical replicates and mean  $\pm$  SD; n=3. Data were assessed using a student's t-test.
- \*P $\leq$  0.05, \*\*P $\leq$  0.01, \*\*\*P $\leq$  0.001, \*\*\*\*P $\leq$  0.0001.

Figure S2 (Related to Figure 2)

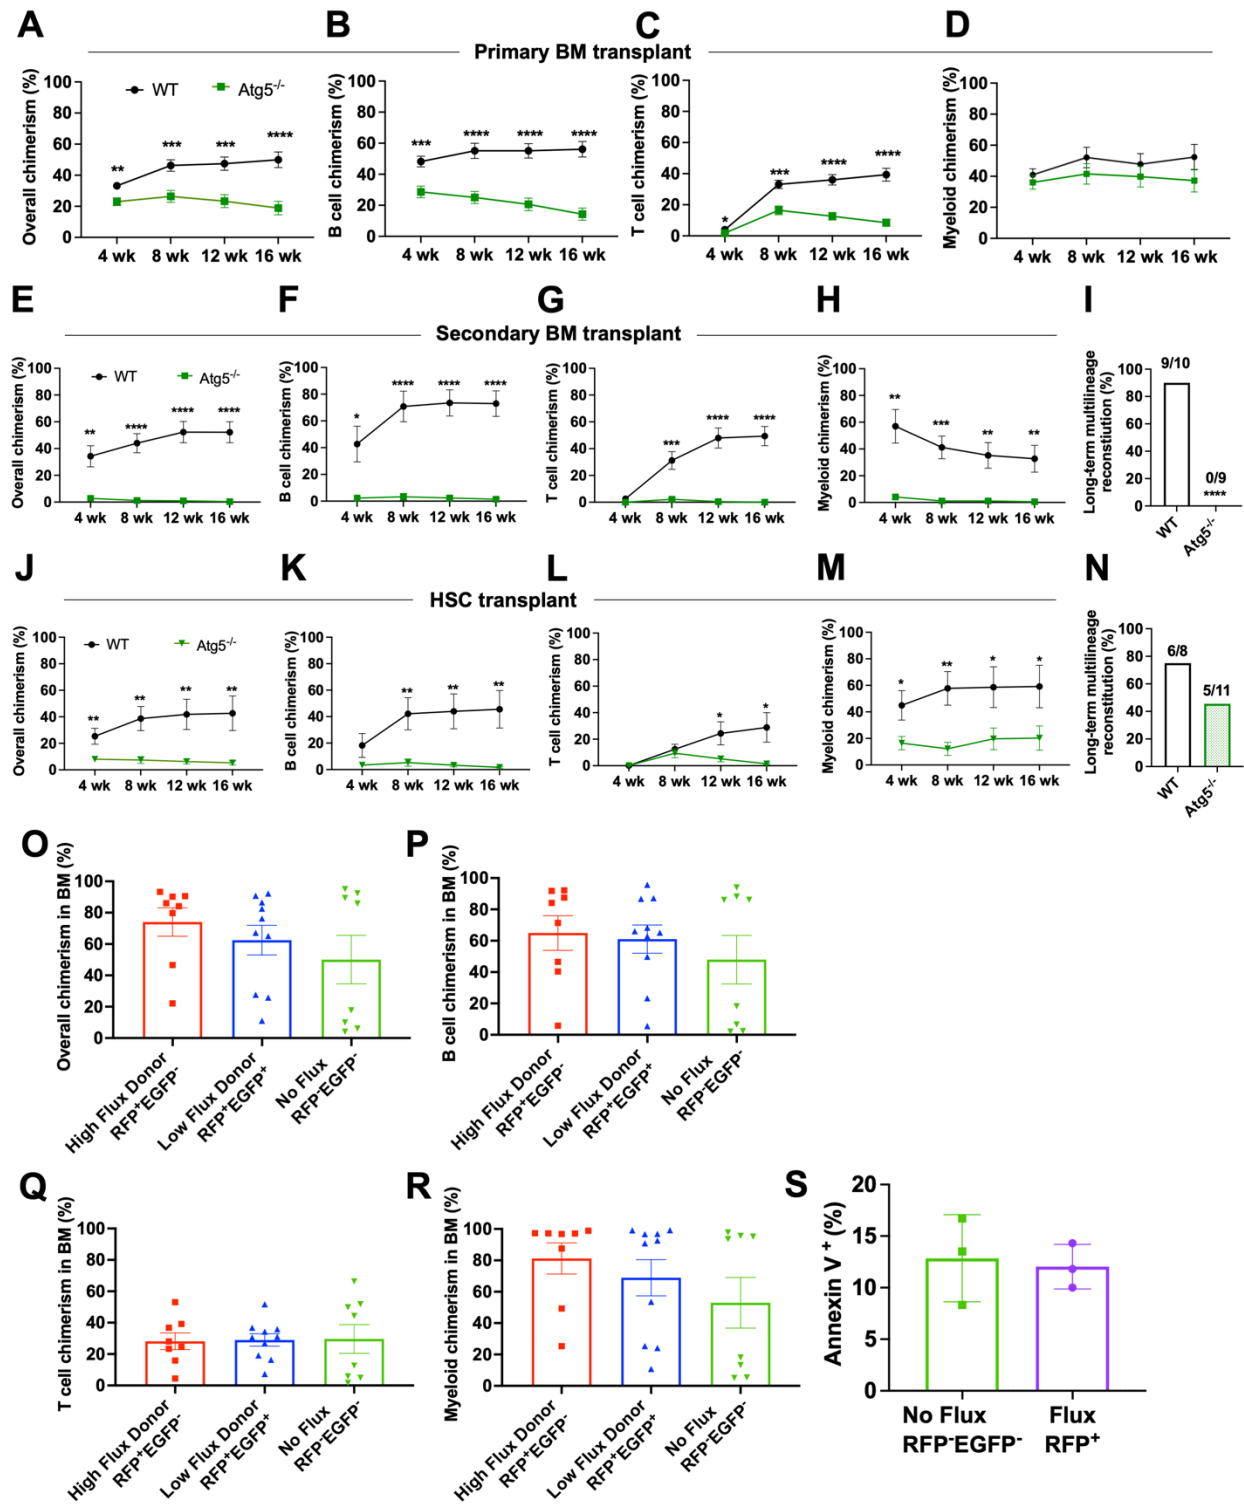

Figure S2. HSCs are not fixed in their autophagic potential. Related to Figure 2.

- A-D Donor hematopoietic (A), B (B), T (C), and myeloid (D) cell engraftment in peripheral blood of mice transplanted with  $5 \times 10^5$  WT or *Atg5*<sup>-/-</sup> bone marrow cells with  $5 \times 10^5$  competitor bone marrow cells; n=15 recipient mice/genotype from 3 independent experiments. Data show mean  $\pm$  SEM and were assessed using a student's t-test.
- E-H Donor hematopoietic (E), B (F), T (G), and myeloid (H) cell engraftment after transplantation of  $3 \times 10^6$  bone marrow cells from primary recipients of A-D into secondary recipients; n=9-10 recipient mice/genotype from 3 independent experiments. Data show mean  $\pm$  SEM and were assessed using a student's t-test.
- I Frequency of secondary recipients in E-H that exhibited long-term multilineage reconstitution. Data were assessed using a chi-squared test.
- J-M Donor hematopoietic (J), B (K), T (L), and myeloid (M) cell engraftment in peripheral blood of mice transplanted with 25 vehicle WT or *Atg5*<sup>-/-</sup> HSCs together with  $3 \times 10^5$  competitor bone marrow cells; n=8-11 recipient mice/genotype from 2 independent experiments. Data show mean  $\pm$  SEM and were assessed using a student's t-test.
- N Frequency of recipients from J-M that exhibited long-term multilineage reconstitution. Data were assessed using a chi-squared test.
- O-R Long-term donor hematopoietic (O), B (P), T (Q), and myeloid (R) cell engraftment in bone marrow of mice transplanted with 25 RFP<sup>+</sup>EGFP<sup>-</sup> high flux, RFP<sup>+</sup>EGFP<sup>+</sup> low flux, or RFP<sup>-</sup>EGFP<sup>-</sup> no flux HSCs together with  $3 \times 10^5$  competitor bone marrow cells measured 16 weeks post-transplant. Data show individual recipients and mean  $\pm$  SEM; n=10-13 recipients/HSC subset from 3 independent experiments (these are individual mice from Fig. 2B-F). Data were assessed by one-way repeated measures ANOVA.
- S Frequency of Annexin V<sup>+</sup> cells in non-autophagic (RFP<sup>-</sup>EGFP<sup>-</sup>) and autophagic (RFP<sup>+</sup>) HSCs. Data show individual mice  $\pm$  SD; n=3. Data were assessed by a paired student's t-test.

\*P $\leq$  0.05, \*\*P $\leq$  0.01, \*\*\*P $\leq$  0.001, \*\*\*\*P $\leq$  0.0001.

## Figure S3 (Related to Figure 3)

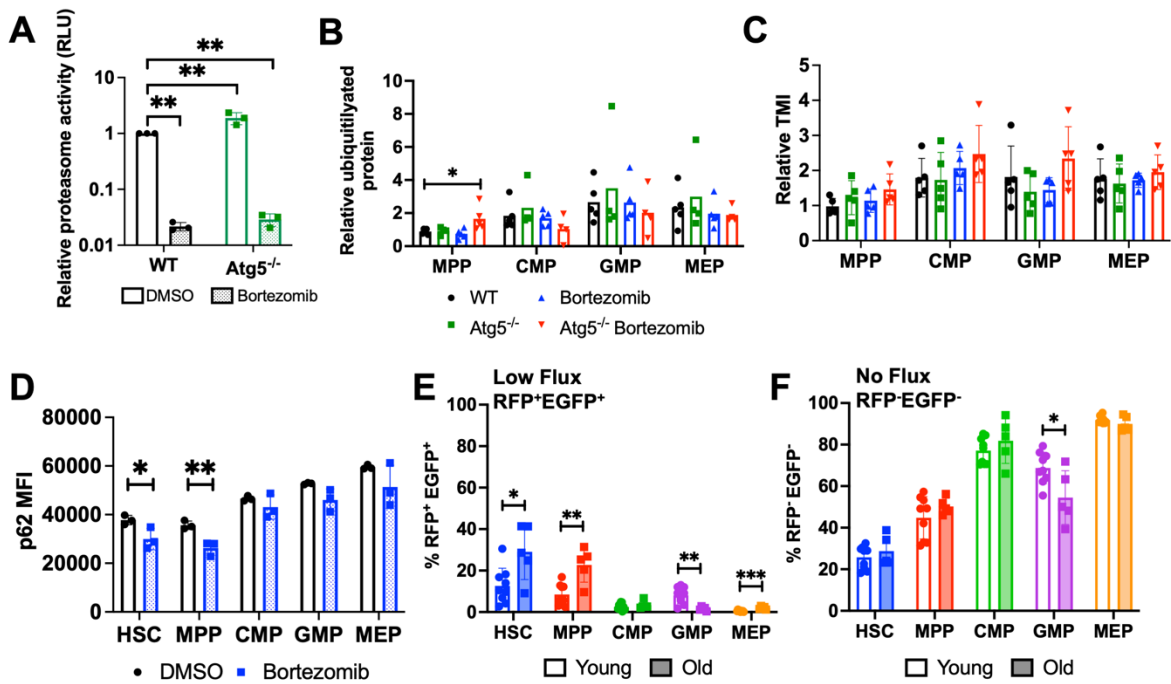

Figure S3. Inhibition of proteasome and autophagy have minimal effects on protein quality control in restricted myeloid progenitors. Related to Figure 3.

- A** Proteasome activity in WT and *Atg5*<sup>-/-</sup> LSK cells after treatment with DMSO or bortezomib. Data show technical replicates and mean  $\pm$  SD; n=3. Data were assessed by one-way ANOVA with Dunnett's test relative to WT DMSO.
- B** Relative ubiquitinated (misfolded) protein in vehicle (DMSO)-treated WT, vehicle-treated *Atg5*<sup>-/-</sup>, bortezomib-treated WT, and bortezomib-treated *Atg5*<sup>-/-</sup> progenitors. Values are normalized to WT HSCs. Data show individual mice and mean  $\pm$  SD; n=4-5/condition from 5 experiments. Data were assessed by one-way ANOVA with Dunnett's test relative to WT DMSO controls.
- C** Relative TMI (unfolded proteins) in vehicle-treated WT, vehicle-treated *Atg5*<sup>-/-</sup>, bortezomib-treated wildtype, and bortezomib-treated *Atg5*<sup>-/-</sup> progenitors. Values are normalized to WT HSCs. Data show individual mice and mean  $\pm$  SD; n=5 from 5 experiments. Data were assessed by one-way ANOVA with Dunnett's test relative to WT DMSO controls.
- D** p62 (MFI) in HSCs and progenitors from mice treated with vehicle (DMSO) or bortezomib. Data show individual mice and mean  $\pm$  SD; n=3. Data were assessed using a paired student's t-test.

E-F Frequency of young (3 month) and old (22-24 month) adult cells exhibiting low (RFP<sup>+</sup>EGFP<sup>+</sup>) (E) and no (RFP<sup>-</sup>EGFP<sup>-</sup>) (F) autophagic flux. Data show individual mice and mean  $\pm$  SD; n=5-9. Data were assessed using a student's t-test.

\*P $\leq$  0.05, \*\*P $\leq$  0.01, \*\*\*P $\leq$  0.001.

**Figure S4 (Related to Figure 4)**

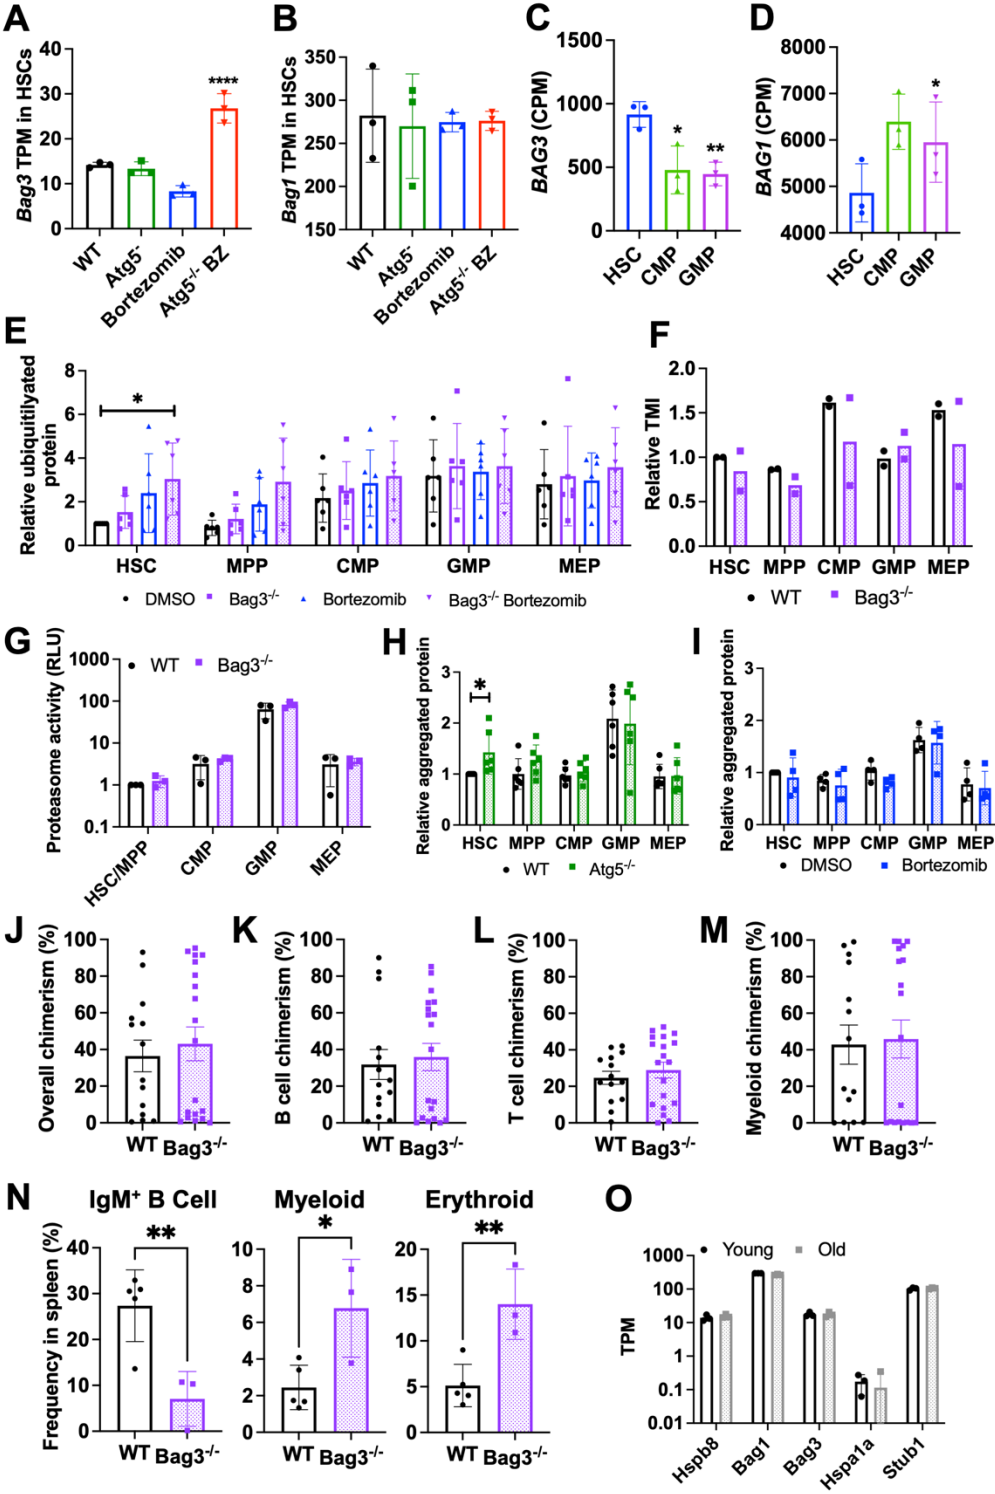

Figure S4. Restricted myeloid progenitors do not rely on Bag3-mediated transport of misfolded proteins into aggresomes for protein quality control. Related to Figure 4.



- A-B *Bag3* (A) and *Bag1* (B) expression in HSCs from WT, *Atg5*<sup>-/-</sup>, bortezomib-treated WT, and bortezomib-treated *Atg5*<sup>-/-</sup> mice. Data show individual replicates and mean transcripts per million (TPM) ± SD; n=3. Data were assessed by one-way ANOVA with Dunnett's test relative to WT.
- C *BAG3* expression in human cord blood-derived HSCs, CMPs, and GMPs. Data show individual replicates and mean ± SD; n=3. Data were assessed by one-way ANOVA with Dunnett's test relative to WT.
- D *BAG1* expression in human HSCs, CMPs, and GMPs Data show individual replicates and mean counts per million ± SD from Laurenti et al., 2013 and Xie et al., 2019; n=3. Data were assessed by one-way ANOVA with Dunnett's test relative to WT.
- E Relative ubiquitinated (misfolded) protein levels in hematopoietic stem and progenitor cells from vehicle (DMSO)- and bortezomib-treated WT and *Bag3*<sup>-/-</sup> mice. Data show mean ± SD; n=6 from 6 experiments. Data were assessed by one-way ANOVA with Dunnett's test relative to DMSO control.
- F Relative unfolded protein (TMI fluorescence) in WT and *Bag3*<sup>-/-</sup> HSCs and progenitors. Data show individual mice; n=2.
- G Proteasome activity in WT and *Bag3*<sup>-/-</sup> CD48<sup>+</sup>LSK HSC/MPPs. Data show mean ± SD; n=3. Data were assessed using a student's t-test.
- H Relative aggregated protein levels (ProteoStat MFI) in WT and *Atg5*<sup>-/-</sup> HSCs and progenitors. Data show individual replicates and mean ± SD; n=6. Data were assessed using a student's t-test.
- I Relative aggregated protein (ProteoStat MFI) in HSCs and progenitor cells from WT mice treated with vehicle (DMSO) or bortezomib. Data show replicates and mean ± SD; n=4 from 4 independent experiments. Data were assessed using a student's t-test.
- J-M Donor hematopoietic (J), B (K), T (L), and myeloid (M) cell chimerism 16 weeks after secondary transplant of 3x10<sup>6</sup> bone marrow cells from transplant primary recipients of WT or *Bag3*<sup>-/-</sup> HSCs from Fig. 4M-P. Data show individual mice and means; n=13-19 recipients from 3-4 primary donors. Data were assessed using a student's t-test.
- N Frequency of IgM<sup>+</sup> B cells, myeloid lineage cells, and erythroid lineage cells in the spleen of old (22-25 month) adult WT and *Bag3*<sup>-/-</sup> mice; n=3-5. Data show individual mice and means ± SD; n=3-5. Data were assessed using a student's t-test.
- O Expression of *Bag3* and *Bag1* complex members in young and old adult HSCs. Data show individual replicates ± SD; n=3. Data were assessed using a paired student's t-test.

\*P ≤ 0.05, \*\*P ≤ 0.01, \*\*\*\*P ≤ 0.0001.
